# 1 A Genotype-to-Phenotype Modeling Framework to Predict 2 Human Pathogenicity of Novel Coronaviruses

3  
4 Phillip Davis<sup>1\*</sup> and Joseph A. Russell<sup>1</sup>

5  
6 1. MRIGlobal, Life Sciences Resource Center – Applied Biology & Bioinformatics Group  
7 65 West Watkins Mill Road, Gaithersburg, MD, USA 20878

8  
9 \*Corresponding Author – email: [pdavis@mriglobal.org](mailto:pdavis@mriglobal.org)

10

## 11 Abstract

12

13 Leveraging prior viral genome sequencing data to make predictions on whether an unknown,  
14 emergent virus harbors a ‘phenotype-of-concern’ has been a long-sought goal of genomic  
15 epidemiology. A predictive phenotype model built from nucleotide-level information alone has  
16 previously been considered un-tenable with respect to RNA viruses due to the ultra-high intra-  
17 sequence variance of their genomes, even within closely related clades. Building from our prior  
18 work developing a degenerate k-mer method to accommodate this high intra-sequence variation  
19 of RNA virus genomes for modeling frameworks, and leveraging a taxonomic ‘group-shuffle-  
20 split’ paradigm on complete coronavirus assemblies from prior to October 2018, we trained  
21 multiple regularized logistic regression classifiers at the nucleotide k-mer level capable of  
22 accurately predicting withheld SARS-CoV-2 genome sequences as human pathogens and  
23 accurately predicting withheld Swine Acute Diarrhea Syndrome coronavirus (SADS-CoV)  
24 genome sequences as non-human pathogens. LASSO feature selection identified several  
25 degenerate nucleotide predictor motifs with high model coefficients for the human pathogen  
26 class that were present across widely disparate classes of coronaviruses. However, these motifs  
27 differed in which genes they were present in, what specific codons were used to encode them,  
28 and what the translated amino acid motif was. This emphasizes the importance of a phenetic  
29 view of emerging pathogenic RNA viruses, as opposed to the canonical phylogenetic  
30 interpretations most-commonly used to track and manage viral zoonoses. Applying our model to  
31 more recent *Orthocoronavirinae* genomes deposited since October 2018 yields a novel  
32 contextual view of pathogen-potential across bat-related, canine-related, porcine-related, and  
33 rodent-related coronaviruses and critical adaptations which may have contributed to the  
34 emergence of the pandemic SARS-CoV-2 virus. Finally, we discuss the utility of these predictive  
35 models (and their associated predictor motifs) to novel biosurveillance protocols that  
36 substantially increase the ‘pound-for-pound’ information content of field-collected sequencing  
37 data and make a strong argument for the necessity of routine collection and sequencing of  
38 zoonotic viruses.

## 39 Introduction

40 To date, the applicability of genomic sequencing data to zoonotic viral outbreaks and pandemics  
41 has primarily served in *post*-outbreak genomic epidemiology roles. When a novel viral pathogen  
42 emerges, genome sequence data is compared against prior data from other close relatives. From  
43 these analyses, public health risk and resourcing (1,2), transmission chains (3), and other  
44 response-related information (4) is inferred. Several studies have begun to address the utility of  
45 viral genome sequencing data in a *pre*-outbreak, predictive methodology through development of  
46 increasingly complex machine learning techniques that attempt to understand the emergence of  
47 particular viral phenotypes (5–12). However, while these works provide important novel  
48 biological characterization methods, their immediate applied utility for biosurveillance is limited  
49 due to the complexity of interpreting their outputs.

50  
51 The emergence of the SARS-CoV-2 virus, and the ensuing pandemic, has emphasized our  
52 continued vulnerability to zoonotic pathogens. Despite several smaller scale outbreaks of  
53 dangerous Betacoronaviruses (namely SARS and MERS), our preparedness and ability to  
54 forecast these emergent pathogens have made little advancement. Traditionally, the approach to  
55 understanding differences in viral phenotypes has involved problematic experimental evolution,  
56 or gain-of-function research through recombinant genetics system (13, 14).

57  
58 Our previous work developed a feature-agglomeration method adapted to “bag-of-words” style  
59 feature extraction in RNA viruses (15). We used this method to fit a binary logistic regression  
60 model for *Orthocoronavirinae* around a response variable of human pathogen vs non-human  
61 pathogen. While this method focused on explanatory modeling by emphasizing numerical  
62 stability and training-set accuracy as the model selection criteria, the original feature extraction  
63 and model fitting implementation limited its predictive power and resulted in overfitting to the  
64 training data. This dilemma of model extrapolation is an old problem in statistical analysis and  
65 machine learning (16, 17) and is still salient in biological data science applications. This has led  
66 to assertions that the goal of prediction for threat of viral emergence, directly from sequence  
67 data, is infeasible based on currently available data and biological knowledge (18).

68  
69 We provide a solution to these problems specifically in the case of *Orthocoronavirinae*, while  
70 also demonstrating techniques that could be applied across the viral kingdom. We have  
71 developed a protocol for feature extraction and cross-validation that is specific to the viral  
72 genomics domain to produce actionable and *predictive* genotype-to-phenotype information for  
73 global health and pandemic preparedness experts, directly from genomic data.

## 74 **Methods**

### 75 **Data Labeling and Grouping**

76 We adopted the same data labeling assumptions regarding human-pathogen class membership  
77 that were stipulated in our previous work (15). To reiterate, bat coronaviruses are assumed to not  
78 be human coronaviruses. Civet SARS and camel MERS isolates are labeled as human  
79 coronaviruses (reflecting their suspected roles as facilitators of spillover), along with the rest of  
80 the known human coronaviruses. All other species of coronavirus are labeled as non-human  
81 pathogens.

82  
83 In the application of group labels for stratified resampling and cross-validation, we created a  
84 composite label that combined the species level taxid assigned for each virus sequence with its  
85 class label with regards to human-pathogen status. This approach attempts to capture the nuance  
86 in certain clades of coronaviruses, such as Betacoronavirus 1, where certain members of the  
87 species (e.g., PHEV and Bovine COV) appear to have well defined barriers with regards to their  
88 capabilities as human-pathogens but share a species designation with a known human-pathogen  
89 coronavirus like OC43 (19, 20). This method results in 63 group labels applied across the  
90 training set.

### 92 **Feature Extraction**

93 We previously developed a feature extraction method (15), *Vorpal*, to reconcile the k-mer-based  
94 sequence representations with the inter-example variance in RNA virus genomes. This method  
95 worked by counting k-mers across the input sequences, removing k-mers that appear below a  
96 frequency quantile threshold, and performing hierarchical clustering on the remaining k-mers.  
97 Using hamming distance as the metric and producing flat clusters from the resulting k-mer tree at  
98 different branch lengths, we can produce de-facto k-mer alignments that can be re-encoded using  
99 International Union of Pure and Applied Chemistry (IUPAC) nucleic acid characters. This  
100 functions as a dimensionality-reduction technique that represents the higher dimensional k-mer  
101 space into a smaller vocabulary of degenerate motifs that retains information about observed  
102 variance in the training data. We can construct feature spaces using this technique that are  
103 influenced by three parameters: k size, k-mer frequency cutoff to proceed to clustering, and  
104 degeneracy cutoff for flat clustering of the k-mer tree. A simple example to illustrate this concept  
105 is depicted in *Figure 1*.

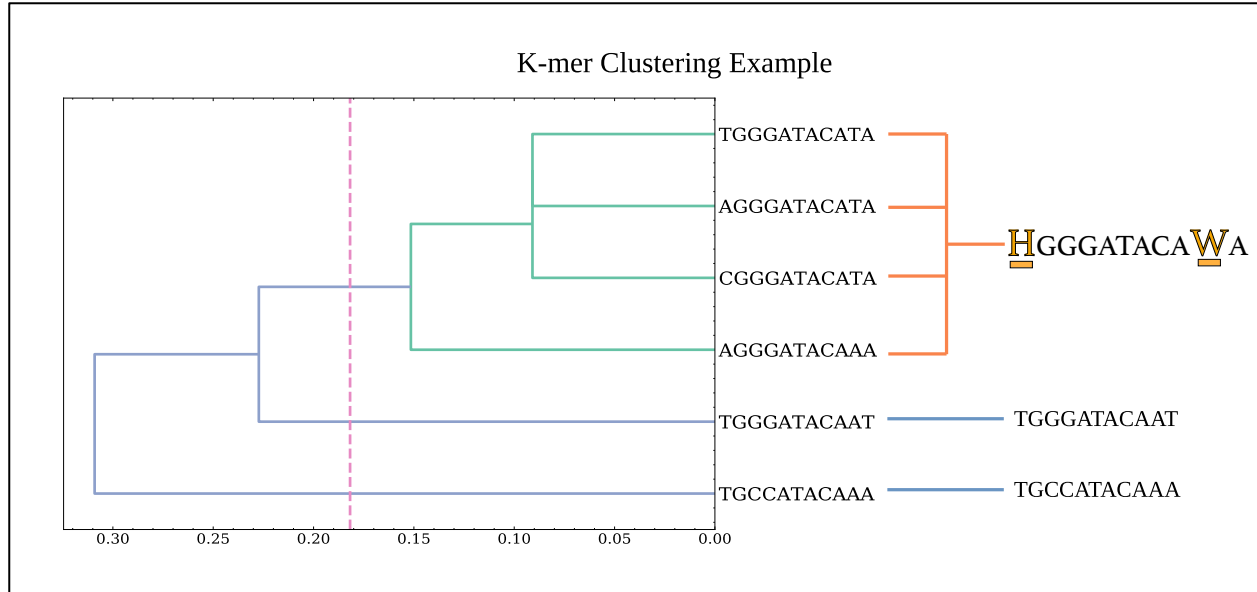

106

107 **Figure 1.** Example clustering of hypothetical 11mers with a 2.0 degeneracy cutoff parameter.  
108 Dashed line indicates maximum distance for flat clustering. This distance cutoff is calculated by  
109 dividing degeneracy allowance by k-length. In this example  $2.0/11 \approx .182$ . The four k-mers of the  
110 top branches are collapsed into a single 'degenerate' k-mer by substituting 'H' for the variable  
111 T, A, and C bases in the first position and 'W' for the variable T and A bases in the second-to-  
112 last position.

113

#### 114 Cross-Validation and Resampling

115 Expanding on this feature extraction technique, we employed several methods to transition this  
116 approach from an explanatory paradigm to a *predictive* one. To accomplish this, we utilized two  
117 key strategies to reduce possible sources of model variance. First, we used a cross-validation  
118 technique to guide model selection that leverages the intrinsic modal organization of genomics  
119 data imparted by phylogenetic relationships. This characterizes the problem of predictive  
120 phenotype modeling as one where generalization of the model would mean maintaining accuracy  
121 to a novel mode of the sample distribution, or in other words, a new species or clade of the viral  
122 family. Therefore, we leverage taxonomic organization of the training data to implement a  
123 group-shuffle-split (GSS) cross-validation approach (21). This simulates the problem of having  
124 several species of each class represented in the training set and allows a search over model  
125 parameters that maximize the ability to generalize to a withheld species in the validation set. In  
126 **Figure 2**, a visualization of this modality in the sample space is demonstrated through a two-  
127 dimensional t-distributed Stochastic Neighbor Embedding (tSNE) using the features for the  
128 selected model discussed in the Results.

129

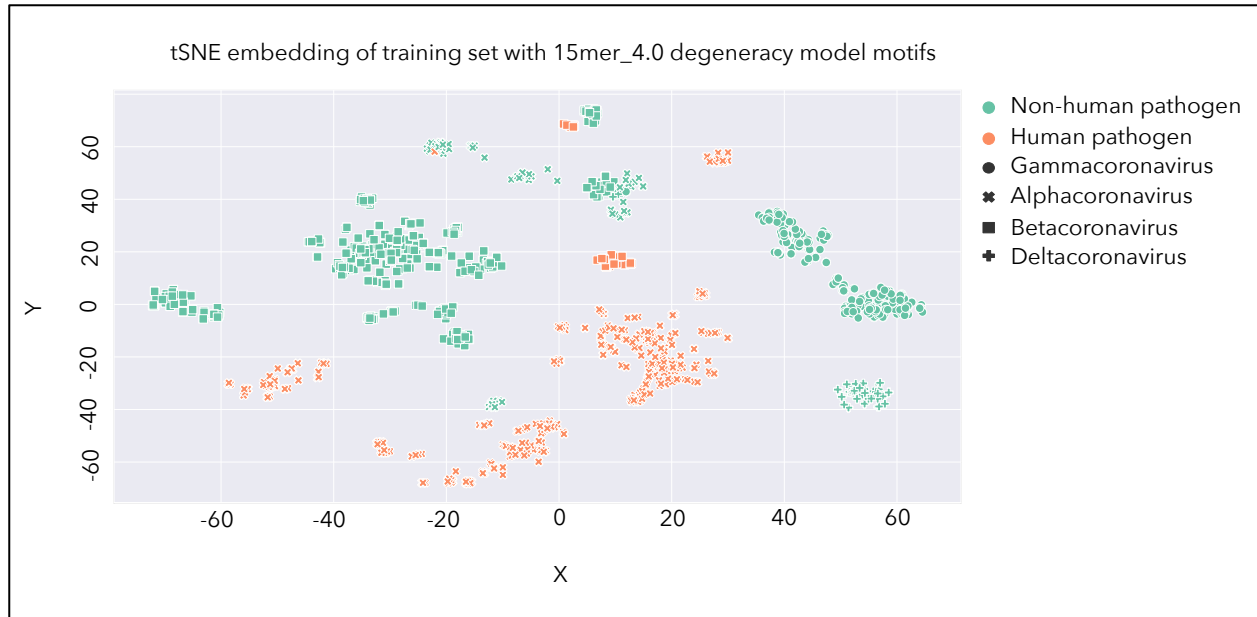

130

131 **Figure 2.** *tSNE embedding with features used in the 15mer 4.0 degeneracy-cutoff model*  
132 *examined in results. This visualizes the modality of virus sequences in the sample space.*

133

134 The second key factor in this predictive modeling approach is the implementation of a stratified  
135 resampling technique. Since we chose to use a high-bias model such as logistic regression, what  
136 remained was the management of other possible sources of model variance. One substantial  
137 source of variance is the skewed representation of complete *Orthocoronavirinae* genomes from  
138 clades with clinical and/or other human-related interest. We combat this source of variance by a  
139 stratified resampling method (22). This resampling method is used at training time to uniformly  
140 resample instances from the training set based on the same taxonomic organization utilized in the  
141 GSS cross-validation strategy. Additionally, since the *Vorpal* feature extraction methodology is  
142 sensitive to this representation bias as a result of the quantile cutoff for k-mer clustering, we use  
143 this same resampling technique in the generation of the clustered k-mer motifs. Leveraging this  
144 taxonomically-guided resampling at all steps in the process where model variance could  
145 potentially be introduced as a side effect of sampling biases allows for effective model training  
146 routines to find a closer approximation of the “true” function relating the predictor variables with  
147 the response variable.

148

149

150

151

152

153

154

## 155 **Training and Test Set Data**

156 All viral genome sequences for feature extraction and model training were derived from  
157 RVDB14, published October 1<sup>st</sup>, 2018 (23). Of course, given the publication date cut-off, SARS-  
158 CoV-2 records were not present in this data. Additionally, Swine Acute Diarrhea Virus (SADS)  
159 sequences were removed from the training data, while bat-HKU2 sequences were left in and  
160 labeled non-human pathogens consistent with the rest of the labeling criteria.

161

162 In the generation of the test set, SADS and SARS-CoV-2 sequences were downloaded from  
163 NCBI Virus (24). We subsampled 10 sequences representing each W.H.O. variant-of-concern  
164 (VOC) from these downloaded sequences. The test set was completed by adding the RefSeq  
165 SARS-CoV-2 reference sequence as well as WA1, to provide representative diversity of  
166 sequences across the duration of the COVID-19 pandemic. A total of 42 complete SARS-CoV-2  
167 genomes comprised the full test set of ‘positive’ examples (i.e., human pathogen class label). A  
168 total of 34 complete SADS genomes comprised the full test set of ‘negative’ examples (i.e., non-  
169 human-pathogen class label). The designation of SADS as a true negative was supported by the  
170 apparent zoonotic barrier between humans and porcine coronaviruses in general, as well as  
171 reporting of SADS outbreaks in pig farms in China resulting in no documented human sickness  
172 in workers exposed to sick pigs (25).

173

174 Models were fit in triplicate to estimate variance in model accuracy and test set probability as a  
175 result of training set resampling and random initialization of coordinate descent. Parameters for  
176 GSS were .10 splits, meaning 10% of groups were separated for validation with each split, with  
177 100 training and validation splits produced for each training session. The training set of 2276  
178 sequences was randomly super-sampled to 4000 instances using the stratified resampling method  
179 described above. P-values for coefficients were not estimated, as predictive power to withheld  
180 data is the preferred model evaluation criteria in this context.

181

182 Model selection was performed by first producing degenerate motifs across combinations of two  
183 feature extraction parameters; k-mer size and degeneracy cutoff. Then, each of these feature sets  
184 was used to fit models with a grid search cross-validation routine that searched over the L1  
185 regularization parameter  $C$  using GSS as the cross validator, where  $C$  is the inverse of the L1  
186 regularization term  $\lambda$ . Quantile cutoff for k-mer clustering was selected for each k-size based on  
187 available system memory constraints (2TB) and are stipulated in *Supplementary Table 1*. The  
188 complete list of parameters and their values is summarized in **Table 1**. The best estimator was  
189 chosen using mean validation set score, where negative Brier score was the scoring function.  
190 Brier score is equivalent to mean squared error when the outcome is a binary probability  
191 estimate.

192

193

| Tested K-mer $k$ size | Tested Degeneracy Cutoffs | Tested L1 Regularization Parameters ( $C$ ) |
|-----------------------|---------------------------|---------------------------------------------|
| 11                    | 1.0, 2.0                  | .01, 0.1, 1, 10, 100, 1000, 10000           |
| 13                    | 1.0, 2.0, 3.0, 4.0        | .01, 0.1, 1, 10, 100, 1000, 10000           |
| 15                    | 1.0, 2.0, 3.0, 4.0        | .01, 0.1, 1, 10, 100, 1000, 10000           |

194  
195 **Table 1.** *Parameters for feature extraction and LASSO model hyperparameters. Combinations*  
196 *for  $k$ -size and degeneracy cutoff resulted in 15 extracted feature sets. These feature spaces were*  
197 *fit in triplicate with Grid Search over these values for  $C$ . This resulted in 45 fitted models for*  
198 *comparison.*

199  
200 The code for feature extraction and model fitting, training and test data sets, and corresponding  
201 metadata can be accessed at <https://github.com/mriglobal/vorpal>. The repository also contains a  
202 persistent version of the down-selected model described in the *Results* (15mer\_4.0) and a series  
203 of scripts to begin predicting on novel sequences. This software is provided under an MIT  
204 license. A complete list of accession numbers contained in the training and test sets can be found  
205 at <https://github.com/mriglobal/vorpal/tree/master/data> in the tab-separated text files containing  
206 ‘label’ and ‘group’ assignments for each sequence.

207

## 208 Results

209 Following an exhaustive search over feature extraction parameters and the L1 regularization-  
210 term hyperparameter, several models were identified that correctly classified the test set at 100%  
211 accuracy – specifically, the 15-mer models with 2.0 and 4.0 degeneracy cutoff, and the 17-mer  
212 models with 2.0 and 4.0 degeneracy cutoff for  $k$ -mer clustering (**Figure 3**).

213

214 Parameter search over L1 regularization terms was similar to our previous effort. Uniformly,  
215 models were selected by the Brier score criterion (26) for the strongest regularization term  
216 evaluated, which was .01. In *Supplementary Figure 1*, mean cross-validation score is shown to  
217 reach an inflection point at this value across all models.

218

219 We selected one of the 15mer 4.0 model replicates to examine in further detail and deploy as part  
220 of the software repository. This model has many interesting properties that provide potential  
221 insights into what the models have learned about the genomic determinants of human  
222 pathogenicity in coronaviruses. Predictor motifs and their corresponding coefficients are  
223 provided in **Table 2**. The coefficients in logistic regression can be interpreted as the linear effect  
224 of each unit of the predictor variable on the log-odds of the response variable.

225



Human Pathogen Class Probabilities  
for Test-Set Coronavirus Genomes

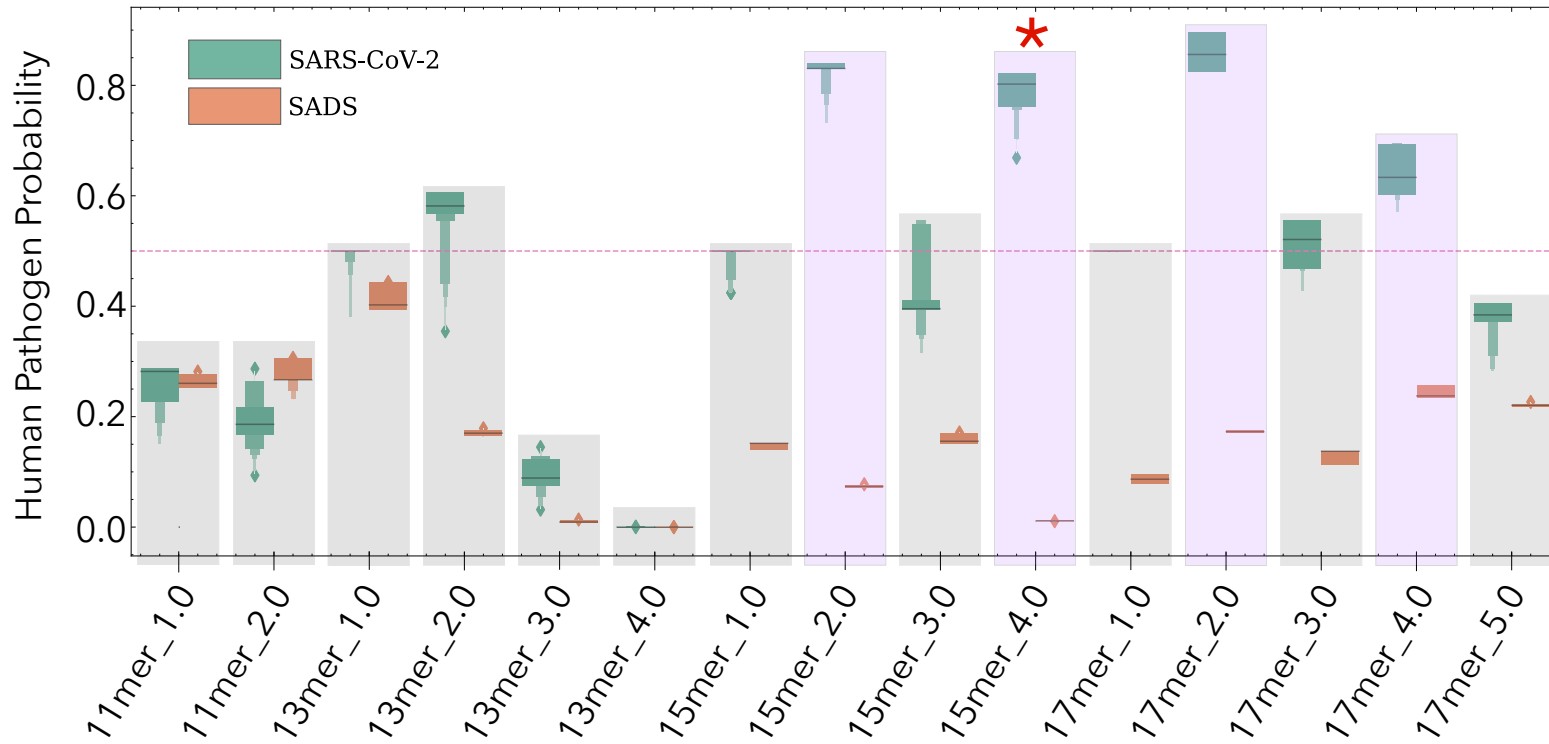

226

227 **Figure 3.** Human pathogen class probabilities for the test set virus genomes across each all model replicates for each combination of  
 228 feature extraction parameters. Models are titled according to their k-mer length and allowable k-mer degeneracy (e.g., “15-  
 229 mer\_4.0”). The classification threshold of 0.5 is shown as a dashed line. Models that correctly classified all 42 SARS-CoV-2 genome  
 230 assemblies in the test set as a human pathogen are indicated by light-purple-shaded boxes. Ineffective models are gray-shaded. All  
 231 models correctly classified all 34 SADS test-set genome assemblies as a non-human pathogen. Red asterisk identifies the feature  
 232 extraction parameters from which the selected model described in the Results was drawn.



233

| Predictor Motif  | Coefficient        |
|------------------|--------------------|
| WWRATKTKGRVGDYB  | -0.509663863818094 |
| HKTWDKHWATTTRDA  | -0.458805349994644 |
| TGWYGHBRNNGYHGY  | -0.437080939216503 |
| NKTKGTNGAYGNNDT  | -0.114321994201719 |
| TBHTGRTRVHRYWGB  | -0.049309692085244 |
| NNVMAAAAAAAAAAAA | -0.013079147572843 |
| NTRNWRNTSNWSHTA  | 0.00161762886654   |
| WDGABGGYGKTVAWW  | 0.008217364487264  |
| KWTWBTSTTTNTGTG  | 0.046266885640273  |
| WSAHDTTHTKNTKT   | 0.161843716501627  |
| DTTWTGATTTTAARK  | 0.162031904207787  |
| TYDMTRATKWHAAVC  | 0.211909992935733  |
| BTDDTGYKGTHANAC  | 0.214019319277427  |
| GRTWBWGATBTTRWK  | 0.262700119920708  |
| KTACTGRTGMCAATG  | 0.278025606363307  |
| ABTWBTKVTKKTAAR  | 0.40624835993548   |
| RATGTTRTTMDWCDA  | 0.542923469132282  |
| DTTGYTTHYTYTRAW  | 0.747300228144597  |

**Table 2.** Predictor motifs with non-zero coefficients after LASSO feature selection for the selected 15-mer with 4.0 degeneracy model. Positive coefficients correspond to an increase in the probability of human-pathogen class membership.

A comparison between different coronaviruses and their respective utilization of the predictor motifs allows for interpretation of the functional origin. As an example, **Table 3** provides a comparative mapping of the model predictor motif, RATGTTRTTMDWCDA, across a variety of coronavirus species, the corresponding codons for that motif in its genomic context, and the amino acids encoded. The first observation is that these motifs appear in association with human pathogenicity across distantly related coronaviruses across several genera, but in varied genomic loci. Secondly,

252 some motifs provide increased class probability mostly through a binary presence/absence (e.g.,  
 253 DTTGYTTHYTYTRAW), while others, such as NTRNWRNTSNWSHTA, act through  
 254 frequency enrichment, appearing up to 45 times in some human-pathogen HKU1 isolates and as  
 255 few as 4 times in Sparrow Coronavirus HKU17. The reuse of these motifs in various genomic  
 256 contexts, while remaining consistently associated with human pathogenicity in these viruses,  
 257 suggests phenetic similarity in their function, as well as underscores the importance of the  
 258 alignment-free characterization of the prediction problem in identifying these phenomena.

260

| Coronavirus     | Accession   | Position   | Sequence Level | RATGTTRTTMDWCA |     |     |     |     | Gene/Domain    |      |
|-----------------|-------------|------------|----------------|----------------|-----|-----|-----|-----|----------------|------|
| 229E            | NC 002645.1 | 23071      | Codon          | GAT            | GTT | GTT | AAT | CAA | Spike HR1      |      |
|                 |             | Amino acid | D              | V              | V   | N   | Q   |     |                |      |
| NL63            | NC 005831.2 | 23516      | Codon          | GAT            | GTT | GTT | AAT | CAA | Spike HR1      |      |
|                 |             | Amino acid | D              | V              | V   | N   | Q   |     |                |      |
| MERS            | NC 019843.3 | 5312       | Codon          | GAT            | GTT | GTT | CTA | CAA | NSP3 Plpro     |      |
|                 |             | Amino acid | D              | V              | V   | L   | Q   |     |                |      |
|                 |             | 19594      | Codon          | AAT            | GTT | GTT | AAA | CAA | NSP15 NendoU   |      |
|                 |             | Amino acid | N              | V              | V   | K   | Q   |     |                |      |
| SARS-CoV-1      | NC 004718.3 | 20065      | Codon          | GAT            | GTT | GTT | AAA | CAA | NSP15 NendoU   |      |
|                 |             | Amino acid | D              | V              | V   | K   | Q   |     |                |      |
| SARS-CoV-1      | NC 004718.3 | 10866      | Codon          | GAT            | GTT | GTT | AGA | CAA | NSP5 Mpro      |      |
|                 |             | Amino acid | D              | V              | V   | R   | Q   |     |                |      |
| SARS-CoV-1      | NC 004718.3 | 21854      | Codon          | AAT            | GTT | GTT | ATA | CGA | Spike NTD      |      |
|                 |             | Amino acid | N              | V              | V   | I   | R   |     |                |      |
| SARS-CoV-2      | NC 045512.2 | 10936      | Codon          | DAT            | GTT | GTT | AGA | CAA | NSP5 Mpro      |      |
| SARS-CoV-2      | NC 045512.2 | 10936      | Amino acid     | D              | V   | V   | R   | Q   |                |      |
| AcCOV-JC34      | NC 034972.1 | 16560      | Codon          | GAT            | GTT | GTT | AAA | CAA | NSP13 Helicase |      |
| AcCOV-JC34      | NC 034972.1 | 16560      | Amino acid     | D              | V   | V   | K   | Q   |                |      |
| Turkey GammaCOV | NC 010800.1 | 11626      | Codon          | -AA            | TGT | TAT | TAT | ACT | A--            | NSP9 |
|                 |             | Amino acid | K              | C              | Y   | Y   | T   | N   |                |      |

261

262 **Table 3.** A table showing the predictor motif RATGTTRTTMDWCA and the various genomic  
 263 contexts in which it appears across Alpha-, Beta- and Gammacoronaviruses. The motif always  
 264 appears in the same reading frame in Alpha- and Betacoronaviruses while it appears in the +1  
 265 position in Turkey Gammacoronavirus, a non-human pathogen.

266

267 Interpretation of misclassified instances in the training set, especially for the models that  
 268 correctly classified the test set sequences, show several interesting patterns. First, proximal  
 269 phylogenetic ‘near-neighbors’ of known coronaviruses are also proximal in terms of class  
 270 probability. For instance, WIV16 (27), which shares >96% sequence identity to SARS-CoV-1,  
 271 has a class probability of 0.78 while the civet SARS examples like HC/GZ/32/03  
 272 have class probabilities of 0.89 (*Supplementary Data*). This trend continues with late-SARS  
 273 isolates such as WHU having a predicted class probability of 0.95. Of course, this relationship  
 274 would be expected for the training data, but this relationship is maintained in the new SARS-  
 275 CoV-2-related sequences published since the beginning of the pandemic. We used the model to  
 276 predict the class probabilities of these, as well as other novel coronavirus sequences published  
 277 throughout 2020 and 2021. These results are shown in **Table 4**. Bat coronaviruses with proximity  
 278 in sequence identity to SARS-CoV-2 (28, 29), such as RmYN02, RpYN06 and RaTG13, exhibit  
 279 human pathogen class probabilities that are proximal to the class probability of SARS-CoV-2.  
 280 This demonstrates that the model has learned a class definition that extends outside of the  
 281 observed phylogenetic relationships seen at training time.

282

283

284

285

286

287

| Virus Name                                | Human Pathogen Probability |
|-------------------------------------------|----------------------------|
| Betacoronavirus 1 strain GCCDC4           | 0.02                       |
| Rodent coronavirus isolate GCCDC5         | 0.03                       |
| Porcine DeltaCOV 0256-1                   | 0.04                       |
| Betacoronavirus 1 isolate GCCDC3          | 0.05                       |
| Porcine DeltaCOV 0081-4                   | 0.06                       |
| Porcine DeltaCOV 0329-4                   | 0.06                       |
| Canine coronavirus isolate CCoV-HuPn-2018 | 0.12                       |
| PrC31                                     | 0.15                       |
| Rc-o319                                   | 0.16                       |
| Ra7909                                    | 0.2                        |
| Rs7907                                    | 0.21                       |
| Rs7931                                    | 0.22                       |
| Rs7905                                    | 0.24                       |
| RsYN03                                    | 0.32                       |
| PCoV_GX-P2V                               | 0.32                       |
| RacCS203                                  | 0.37                       |
| <b>RaTG13</b>                             | <b>0.63</b>                |
| <b>RpYN06</b>                             | <b>0.68</b>                |
| <b>RmYN02</b>                             | <b>0.73</b>                |
| <b>SARS-CoV-2</b>                         | <b>0.76</b>                |

288

289 **Table 4.** *Human Pathogen class probabilities for novel coronavirus sequences published after*  
290 *the beginning of the COVID-19 pandemic (including SARS-CoV-2), produced from the down-*  
291 *selected 15mer\_4.0 degeneracy model.*

292

293 Another interesting pattern observed in the training set was a group of Bat SARS-like and  
294 MERS-like viruses that were routinely classified as human pathogens – specifically, members of  
295 Jinning mine group of viruses such as Rs4231 and Rs4874, as well as the MERS-likes NL13845  
296 and NL140422 sampled from a cave in Guangdong (30,31). These class designations seem to be  
297 supported by serological evidence of positivity to SARS-likes reported in the area surrounding  
298 the Jinning cave from which these SARS-like viruses were sampled (30). Finally, human enteric  
299 coronavirus 4408 was classified as a non-human pathogen in 35 of the 45 trained models,  
300 including those that were 100% accurate on the test set. Complete tables of misclassified training  
301 set accession numbers and class probabilities for each model replicate are available in  
302 Supplementary data. The frequency of this misclassification is potentially explained by 4408’s  
303 status as a strictly child-associated coronavirus (32). Similarly, the novel Canine  
304 alphacoronavirus isolated from a child in Malaysia (33) in 2018 shares a similar, negative  
305 prediction as can be seen in Table 4. The implications of this nuance in data labeling and the  
306 characterization of the problem as a binary classification are examined in the *Discussion*.

307

## 308 Discussion

309

310 Through examination of the model training results, it is possible to see the key determinants of  
311 the success of our approach. First, the choice of model – regularized logistic regression – is  
312 critical to the success of the models. The 17mer, 3.0 degeneracy models are examples where the  
313 models failed to generalize to the test set, but had highest accuracy scores on the training data  
314 (i.e., >99%). Controlling this tendency to overfit, especially where certain nuance or ambiguity  
315 may exist regarding the virus phenotype that is not captured by the binary response variable, is  
316 much more difficult to achieve outside of high bias model families like generalized linear  
317 models. Second, the positionally-independent representation of the feature space provided by the  
318 *Vorpal* feature extraction methodology allows for identification of genome thematics that emerge  
319 as a result of convergent evolution. Finally, the degenerate characteristic of these motif  
320 representations introduced by the k-mer clustering clearly contribute to success in extrapolation.  
321 This is explained by observing several instances where the models did not successfully  
322 generalize to the test set. In many models that were fit with lower degeneracy cutoff parameters,  
323 test set probabilities for SARS-CoV-2 were 0.50 because none of the predictor motifs selected  
324 during training mapped to SARS-CoV-2 (**Figure 3**). Higher degeneracy feature spaces still  
325 identified predictive motifs, and these motifs continued to be present in the test set.

326

327 To understand the underlying biological function of the predictor motifs, we examined their  
328 genomic context. As an example, RATGTRTTMDWCDA, shown in **Table 2**, is located in both  
329 SARS-CoV-1 and SARS-CoV-2 at the domain boundary in NSP5, the Main Protease (Mpro),  
330 between the catalytic domain and the dimerization domain. The arginine that is coded for in the  
331 motif has been demonstrated experimentally in SARS-CoV-1 as critical to dimerization (34).  
332 This motif appears a second time in SARS-CoV-1, in the same reading frame, but in the N-  
333 terminal domain of Spike protein, at a position immediately following an N-linked glycosylation  
334 site. We previously reported the association of N-linked glycosylation sites and motifs  
335 explanatory for host isolate phenotypes in Influenza A as a result of host specific rare codon  
336 selection (15). The identification of both N-linked glycosylation sites and protein domain  
337 boundaries as being sites of rare codon enrichment provides evidence of a translational  
338 efficiency adaptation to facilitate co-translational machinery (35, 36). The identification of  
339 translational efficiency adaptations as critical to viral fitness has started to significantly expand  
340 in the scientific literature (37–39).

341

342 Properties of the NTRNWRNTSNWSHTA motif that led to its association with human  
343 pathogens are not obvious, but examining its patterns of occurrence provides potential hints. As  
344 mentioned, this motif is most abundant in HKU1. However, in addition to this frequency, it also  
345 occurs concurrently in the genome with another unique feature of HKU1 for which the functional

346 purpose is not understood – this motif tracks each instance of the Acid Tandem Repeats (ATRs)  
347 that occur at varying copy number in the hypervariable region of NSP3 in different strains of  
348 HKU1 (40). This motif also appears to be tracking the abundance of consecutive third-position-  
349 thymine codons. The preference of these codons is a well described phenomenon in  
350 coronaviruses, but its functional provenance is not well understood and its enrichment  
351 specifically in human coronaviruses has not been described (41, 42).

352

353 The models also appear to describe a human-pathogen class definition that only includes viruses  
354 that can readily transmit between adults. There are now a series of coronaviruses that appear to  
355 have the capability to cause clinical illness in children, but the children act as terminal hosts for  
356 the virus. This list now includes Canine Alphacoronaviruses observed in Thailand in 2007 (43)  
357 and Malaysia in 2018 (33), Murine Hepatitis Virus detected in SRA datasets from children with  
358 febrile illness (44), Porcine Deltacoronaviruses in children in Haiti in 2014 and 2015 (45), as  
359 well as human enteric coronavirus 4408 (32).

360

### 361 **Nuance to class labeling**

362 There is also a well-documented divide in the symptomology observed in juveniles and adults for  
363 SARS-CoV-2 (46), that is partially described by lower permissivity of infection not attributable  
364 to ACE2 or TMPRSS2 expression levels (47). The models, notably, do not contain predictor  
365 motifs that pertain to these child-specific coronaviruses as they are routinely classified as non-  
366 human. While we are modeling a binary response variable in this work, where ‘human pathogen’  
367 is the positive class, a more accurate description of the class labels we have applied might  
368 include a likelihood of observance. There appears to be some stratification, where sustained  
369 transmission of the virus in humans is *de facto* included as part of the phenotype definition.  
370 Viruses that may be capable of spilling over into humans, but who are, for the virus, terminal  
371 hosts, have genotypic features which are not captured in our models.

372

### 373 **A Universal Framework**

374 While this effort represents a specific procedure with respect to this feature extraction technique,  
375 the theoretical framework is one that can be generally applied. The task for supervised learning  
376 on biological sequence data is to transform to a feature subspace where the learner is  
377 interpolating over the feature space as it pertains to the response variable, and is no longer  
378 extrapolating. We believe these methodologies are applicable not just across the RNA virus  
379 *genome* domain, but also across multiple feature spaces such as protein and RNA secondary  
380 structure. We will explore this in future work.

381

382

383

384

## 385 **Improving Biosurveillance Protocols**

386 The implications of the models support a potential reimagining of biosurveillance efforts and  
387 pandemic prevention. The ability to predict pathogenic phenotypes of viruses well ahead of  
388 spillover, directly from sequence data, can enable more effective focusing of resource allocation  
389 for ecological monitoring and prevention. The results described in this work are, to our  
390 knowledge, the first demonstration of this capability. Determination of the biological function of  
391 model predictors may yield a more detailed understanding of why certain organisms, such as  
392 Camels and Civets, seem to act as keystone species for the spillover of certain viral families like  
393 *Orthocoronavirinae*. This could produce a road map to understand the host genomic  
394 determinants that condition these viral genomes for emergence from their natural reservoirs.

395

396 Leveraging predictive motifs in field-forward ‘sequence-search’ missions can enable genomic  
397 epidemiologists to identify problematic viruses more quickly on site. Despite the criticality of  
398 genome assembly and phylogenetic analyses during emerging outbreak scenarios, their  
399 cumbersome and time-consuming nature limits the utility and feasibility of sequencing  
400 operations in field-forward surveillance efforts and prevents investments in such infrastructure  
401 and programs. Predictive motifs can be modeled directly in raw voltage disturbance signals from  
402 nanopore platforms (48). Searching for predictive motifs from raw electrical signal obviates the  
403 need for in-field basecalling, enabling more streamlined field-forward sequencing infrastructure.  
404 Such infrastructure can alleviate sample bottlenecks at central reference laboratories and  
405 establish a more efficient public health response network.

406

407 As the COVID-19 pandemic has made abundantly clear, the time is now for investments in these  
408 types of next-generation biosurveillance ecosystems. Predictive feature-extraction genome  
409 modeling frameworks, such as those described here, are poised to underwrite this emerging  
410 paradigm.

411

412

413

414

415

416

417

418



## 419 **References**

420

421 1. P. Tang, M. A. Croxen, M. R. Hasan, W. W. L. Hsiao, L. M. Hoang, Infection control in  
422 the New Age of genomic epidemiology. *American Journal of Infection Control*. **45**, 170–  
423 179 (2017), doi:10.1016/j.ajic.2016.05.015.

424 2. J. L. Gardy, N. J. Loman, Towards a genomics-informed, real-time, Global Pathogen  
425 Surveillance System. *Nature Reviews Genetics*. **19**, 9–20 (2017),  
426 doi:10.1038/nrg.2017.88.

427 3. C. Alteri *et al.*, Genomic epidemiology of SARS-COV-2 reveals multiple lineages and  
428 early spread of SARS-COV-2 infections in Lombardy, Italy. *Nature Communications*. **12**  
429 (2021), doi:10.1038/s41467-020-20688-x.

430 4. D. Chakraborty, A. Agrawal, S. Maiti, Rapid identification and tracking of SARS-COV-2  
431 variants of concern. *The Lancet*. **397**, 1346–1347 (2021), doi:10.1016/s0140-  
432 6736(21)00470-0.

433 5. Mollentze, N., Babayan, S. and Streicker, D., 2021. Identifying and prioritizing potential  
434 human-infecting viruses from their genome sequences. *bioRxiv*, pp.2020-11.

435 6. F. Young, S. Rogers, D. L. Robertson, Predicting host taxonomic information from viral  
436 genomes: A comparison of feature representations. *PLOS Computational Biology*. **16**  
437 (2020), doi:10.1371/journal.pcbi.1007894.

439 7. S. A. Babayan, R. J. Orton, D. G. Streicker, Predicting reservoir hosts and arthropod  
440 vectors from evolutionary signatures in rna virus genomes. *Science*. **362**, 577–580  
441 (2018), doi:10.1126/science.aap9072.

442 8. A. Pavlova *et al.*, Machine learning reveals the critical interactions for SARS-COV-2  
443 spike protein binding to ACE2. *The Journal of Physical Chemistry Letters*. **12**, 5494–  
444 5502 (2021), doi:10.1021/acs.jpcclett.1c01494.

445 9. M. G. Ferrarini *et al.*, Genome-wide bioinformatic analyses predict key host and viral  
446 factors in SARS-COV-2 pathogenesis. *Communications Biology*. **4** (2021),  
447 doi:10.1038/s42003-021-02095-0.

448 10. X. Hernandez-Alias, H. Benisty, M. H. Schaefer, L. Serrano, Translational adaptation of  
449 human viruses to the tissues they infect. *Cell Reports*. **34**, 108872 (2021).

450 11. G. S. Randhawa *et al.*, Machine learning using intrinsic genomic signatures for rapid  
451 classification of novel pathogens: Covid-19 case study. *PLOS ONE*. **15** (2020),  
452 doi:10.1371/journal.pone.0232391.



- 453 12. A. B. Gussow *et al.*, Genomic determinants of pathogenicity in SARS-COV-2 and other  
454 human coronaviruses. *Proceedings of the National Academy of Sciences*. **117**, 15193–  
455 15199 (2020), doi:10.1073/pnas.2008176117.
- 456 13. N. D. Grubaugh, K. G. Andersen, Experimental evolution to study virus emergence. *Cell*.  
457 **169**, 1–3 (2017), doi:10.1016/j.cell.2017.03.018.
- 458 14. B. Hu *et al.*, Discovery of a rich gene pool of bat SARS-related coronaviruses provides  
459 new insights into the origin of SARS coronavirus. *PLOS Pathogens*. **13** (2017),  
460 doi:10.1371/journal.ppat.1006698.
- 461 15. P. Davis *et al.*, Vorpai: A novel RNA virus feature-extraction algorithm demonstrated  
462 through interpretable genotype-to-phenotype linear models (2020),  
463 doi:10.1101/2020.02.28.969782.
- 464 16. G. J. Hahn, The hazards of extrapolation in regression analysis. *Journal of Quality*  
465 *Technology*. **9**, 159–165 (1977), doi:10.1080/00224065.1977.11980791.
- 466 17. Webb *et al.* Learning Representations that Support Extrapolation (2020)  
467 arXiv:2007.05.059v2 [cs.CV]
- 468 18. E. C. Holmes, A. Rambaut, K. G. Andersen, Pandemics: Spend on surveillance, not  
469 prediction. *Nature*. **558**, 180–182 (2018), doi:10.1038/d41586-018-05373-w.
- 470 19. H. Turlewicz-Podbielska, M. Pomorska-Mól, Porcine coronaviruses: Overview of the  
471 state of the art. *Virologica Sinica* (2021), doi:10.1007/s12250-021-00364-0.
- 472 20. H. M. Amer, Bovine-like coronaviruses in domestic and wild ruminants. *Animal Health*  
473 *Research Reviews*. **19**, 113–124 (2018), doi:10.1017/s1466252318000117.
- 474 21. F. Pedregosa *et al.*, Scikit-learn: Machine Learning in Python. *The Journal of Machine*  
475 *Learning Research*. **12**, 2825–2830 (2011).
- 476 22. Z. Botev, A. Ridder, Variance reduction. *Wiley StatsRef: Statistics Reference Online*, 1–6  
477 (2017), doi:10.1002/9781118445112.stat07975.
- 478 23. N. Goodacre, A. Aljanahi, S. Nandakumar, M. Mikailov, A. S. Khan, A reference viral  
479 database (RVDB) to enhance bioinformatics analysis of high-throughput sequencing for  
480 novel virus detection. *mSphere*. **3** (2018), doi:10.1128/mspheredirect.00069-18.
- 481 24. E. L. Hatcher *et al.*, Virus variation resource – improved response to emergent viral  
482 outbreaks. *Nucleic Acids Research*. **45** (2016), doi:10.1093/nar/gkw1065.
- 483 25. P. Zhou *et al.*, Fatal swine acute diarrhoea syndrome caused by an HKU2-related  
484 coronavirus of Bat Origin. *Nature*. **556**, 255–258 (2018), doi:10.1038/s41586-018-0010-  
485 9.

- 486 26. G. W. Brier, VERIFICATION OF FORECASTS EXPRESSED IN TERMS OF  
487 PROBABILITY. *Monthly Weather Review*. **78**, 1–2 (1950),  
488 doi:[https://doi.org/10.1175/1520-0493\(1950\)078<0001:VOFEIT>2.0.CO;2](https://doi.org/10.1175/1520-0493(1950)078<0001:VOFEIT>2.0.CO;2).
- 489 27. X.-L. Yang *et al.*, Isolation and characterization of a novel bat coronavirus closely related  
490 to the direct progenitor of severe acute respiratory syndrome coronavirus. *Journal of*  
491 *Virology*. **90**, 3253–3256 (2016), doi:[10.1128/jvi.02582-15](https://doi.org/10.1128/jvi.02582-15).
- 492 28. H. Zhou *et al.*, A novel bat coronavirus closely related to SARS-COV-2 contains natural  
493 insertions at the S1/S2 cleavage site of the spike protein. *Current Biology*. **30** (2020),  
494 doi:[10.1016/j.cub.2020.05.023](https://doi.org/10.1016/j.cub.2020.05.023).
- 495 29. H. Zhou *et al.*, Identification of novel Bat Coronaviruses sheds light on the evolutionary  
496 origins of SARS-COV-2 and related viruses. *Cell*. **184** (2021),  
497 doi:[10.1016/j.cell.2021.06.008](https://doi.org/10.1016/j.cell.2021.06.008).
- 498 30. N. Wang *et al.*, Serological evidence of bat SARS-related coronavirus infection in  
499 humans, China. *Virologica Sinica*. **33**, 104–107 (2018), doi:[10.1007/s12250-018-0012-7](https://doi.org/10.1007/s12250-018-0012-7).
- 500 31. C.-M. Luo *et al.*, Discovery of novel Bat Coronaviruses in South China that use the same  
501 receptor as Middle East respiratory syndrome coronavirus. *Journal of Virology*. **92**  
502 (2018), doi:[10.1128/jvi.00116-18](https://doi.org/10.1128/jvi.00116-18).
- 503 32. M. G. Han, D.-S. Cheon, X. Zhang, L. J. Saif, Cross-protection against a human enteric  
504 coronavirus and a virulent bovine enteric coronavirus in Gnotobiotic Calves. *Journal of*  
505 *Virology*. **80**, 12350–12356 (2006), doi:[10.1128/jvi.00402-06](https://doi.org/10.1128/jvi.00402-06).
- 506 33. A. N. Vlasova *et al.*, Novel canine coronavirus isolated from a hospitalized pneumonia  
507 patient, East Malaysia. *Clinical Infectious Diseases* (2021), doi:[10.1093/cid/ciab456](https://doi.org/10.1093/cid/ciab456).
- 508 34. T. Hu *et al.*, Two adjacent mutations on the dimer interface of SARS coronavirus 3c-like  
509 protease cause different conformational changes in crystal structure. *Virology*. **388**, 324–  
510 334 (2009), doi:[10.1016/j.virol.2009.03.034](https://doi.org/10.1016/j.virol.2009.03.034).
- 511 35. J. L. Chaney *et al.*, Widespread position-specific conservation of synonymous rare  
512 codons within coding sequences. *PLOS Computational Biology*. **13** (2017),  
513 doi:[10.1371/journal.pcbi.1005531](https://doi.org/10.1371/journal.pcbi.1005531).
- 514 36. K. Honarmand Ebrahimi, G. M. West, R. Flefil, Mass spectrometry approach and Elisa  
515 reveal the effect of codon optimization on N-linked glycosylation of HIV-1 gp120.  
516 *Journal of Proteome Research*. **13**, 5801–5811 (2014), doi:[10.1021/pr500740n](https://doi.org/10.1021/pr500740n).
- 517 37. P. C. Woo *et al.*, Comparative analysis of 22 coronavirus HKU1 genomes reveals a novel  
518 genotype and evidence of natural recombination in Coronavirus HKU1. *Journal of*  
519 *Virology*. **80**, 7136–7145 (2006), doi:[10.1128/jvi.00509-06](https://doi.org/10.1128/jvi.00509-06).

- 520 38. H. Gu, D. K. Chu, M. Peiris, L. L. Poon, Multivariate analyses of codon usage of SARS-  
521 COV-2 and other betacoronaviruses. *Virus Evolution*. **6** (2020), doi:10.1093/ve/veaa032.
- 522 39. W. Hou, Characterization of codon usage pattern in SARS-COV-2. *Virology Journal*. **17**  
523 (2020), doi:10.1186/s12985-020-01395-x.
- 524 40. A. Theamboonlers *et al.*, Human coronavirus infection among children with acute lower  
525 respiratory tract infection in Thailand. *Intervirology*. **50**, 71–77 (2006),  
526 doi:10.1159/000097392.
- 527 41. R. C. Edgar *et al.*, Petabase-scale sequence alignment catalyses viral discovery (2020),  
528 doi:10.1101/2020.08.07.241729.
- 529 42. J. A. Lednicky *et al.*, Emergence of porcine delta-coronavirus pathogenic infections  
530 among children in Haiti through independent zoonoses and convergent evolution (2021),  
531 doi:10.1101/2021.03.19.21253391.
- 532 43. H. Li *et al.*, Age-dependent risks of incidence and mortality of covid-19 in Hubei  
533 Province and other parts of China. *Frontiers in Medicine*. **7** (2020),  
534 doi:10.3389/fmed.2020.00190.
- 535 44. A. Capraro *et al.*, Ageing impairs the airway epithelium defence response to SARS-  
536 COV-2 (2021), doi:10.1101/2021.04.05.437453.
- 537 45. J. Delgado Blanco, X. Hernandez-Alias, D. Cianferoni, L. Serrano, In silico mutagenesis  
538 of human ACE2 with S protein and translational efficiency explain SARS-COV-2  
539 infectivity in different species. *PLOS Computational Biology*. **16** (2020),  
540 doi:10.1371/journal.pcbi.1008450.
- 541 46. R. Aviner, K. H. Li, J. Frydman, R. Andino, Cotranslational prolyl hydroxylation is  
542 essential for flavivirus biogenesis. *Nature*. **596**, 558–564 (2021), doi:10.1038/s41586-  
543 021-03851-2.
- 544 47. Y. Han *et al.*, Monitoring cotranslational protein folding in mammalian cells at codon  
545 resolution. *Proceedings of the National Academy of Sciences*. **109**, 12467–12472 (2012),  
546 doi:10.1073/pnas.1208138109.
- 547 48. Kovaka, S., Fan, Y., Ni, B., Timp, W. and Schatz, M.C., 2021. Targeted nanopore  
548 sequencing by real-time mapping of raw electrical signal with UNCALLED. *Nature*  
549 *Biotechnology*, 39(4), pp.431-441.  
550
- 551
- 552
- 553

554 **SUPPLEMENTARY INFORMATION**

555

| k_size | degeneracy | quantile_cutoff | training_set_accuracy | test_set_accuracy |
|--------|------------|-----------------|-----------------------|-------------------|
| 11     | 1.00       | 0.80            | 0.99                  | 0.45              |
| 11     | 1.00       | 0.80            | 0.98                  | 0.45              |
| 11     | 1.00       | 0.80            | 0.99                  | 0.45              |
| 11     | 2.00       | 0.80            | 0.99                  | 0.45              |
| 11     | 2.00       | 0.80            | 0.99                  | 0.45              |
| 11     | 2.00       | 0.80            | 0.99                  | 0.45              |
| 13     | 1.00       | 0.90            | 0.98                  | 0.45              |
| 13     | 1.00       | 0.90            | 0.98                  | 0.45              |
| 13     | 1.00       | 0.90            | 0.98                  | 0.45              |
| 13     | 2.00       | 0.90            | 0.99                  | 0.93              |
| 13     | 2.00       | 0.90            | 0.99                  | 0.93              |
| 13     | 2.00       | 0.90            | 0.99                  | 0.93              |
| 13     | 3.00       | 0.90            | 0.99                  | 0.45              |
| 13     | 3.00       | 0.90            | 0.98                  | 0.45              |
| 13     | 3.00       | 0.90            | 0.99                  | 0.45              |
| 13     | 4.00       | 0.90            | 1.00                  | 0.45              |
| 13     | 4.00       | 0.90            | 1.00                  | 0.45              |
| 13     | 4.00       | 0.90            | 1.00                  | 0.45              |
| 15     | 1.00       | 0.90            | 0.98                  | 0.45              |
| 15     | 1.00       | 0.90            | 0.98                  | 0.45              |
| 15     | 1.00       | 0.90            | 0.98                  | 0.45              |
| 15     | 2.00       | 0.90            | 0.98                  | 1.00              |
| 15     | 2.00       | 0.90            | 0.98                  | 1.00              |
| 15     | 2.00       | 0.90            | 0.98                  | 1.00              |
| 15     | 3.00       | 0.90            | 0.98                  | 0.58              |
| 15     | 3.00       | 0.90            | 0.98                  | 0.58              |
| 15     | 3.00       | 0.90            | 0.98                  | 0.58              |
| 15     | 4.00       | 0.90            | 0.99                  | 1.00              |
| 15     | 4.00       | 0.90            | 0.99                  | 1.00              |
| 15     | 4.00       | 0.90            | 0.98                  | 1.00              |
| 17     | 1.00       | 0.95            | 0.96                  | 0.45              |
| 17     | 1.00       | 0.95            | 0.96                  | 0.45              |
| 17     | 1.00       | 0.95            | 0.97                  | 0.45              |
| 17     | 2.00       | 0.95            | 0.98                  | 1.00              |
| 17     | 2.00       | 0.95            | 0.98                  | 1.00              |
| 17     | 2.00       | 0.95            | 0.98                  | 1.00              |
| 17     | 3.00       | 0.95            | 0.99                  | 1.00              |
| 17     | 3.00       | 0.95            | 0.99                  | 0.45              |
| 17     | 3.00       | 0.95            | 0.99                  | 0.45              |
| 17     | 4.00       | 0.95            | 0.99                  | 1.00              |
| 17     | 4.00       | 0.95            | 0.99                  | 1.00              |
| 17     | 4.00       | 0.95            | 0.99                  | 1.00              |
| 17     | 5.00       | 0.95            | 0.98                  | 0.45              |
| 17     | 5.00       | 0.95            | 0.99                  | 0.45              |
| 17     | 5.00       | 0.95            | 0.99                  | 0.45              |

556

557 **Supplementary Table 1.** Training set and test set accuracy across all modeled feature  
558 parameter combinations (in triplicate). Pink-shaded are those models that correctly classified all  
559 42 SARS-CoV-2 test-set assemblies as a human pathogen and correctly classified all 34 SADS  
560 test-set assemblies as non-human-pathogens.

561

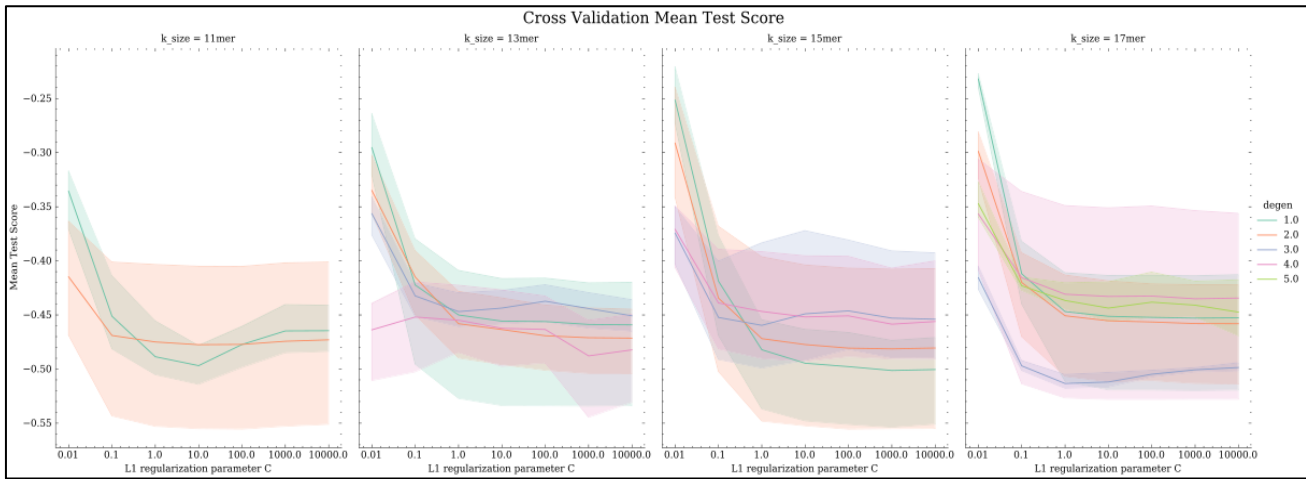

562

563 **Supplementary Figure 1.** Mean Cross Validation Scores for the validation splits across all  $k$ -  
564 sizes and degeneracy cutoffs for clustering. Almost every model show dramatic improvements in  
565 Brier score as the regularization parameter gets stronger.  
566
